# Supplementary material for: Nitride-incorporated W–Fe–S double cubane clusters: terminal ligand substitutions and redox behaviors
Source: Royal Society of Chemistry journal article supplement (doi:10.1039/d1dt00414j), 2021-01-01
Supplement: d1dt00414j1.pdf [file d1dt00414j1.pdf]

## Supplementary Information

Table S1. Crystallographic data of the Et<sub>4</sub>N<sup>+</sup> salt of clusters **2–6**.

| Complex                                                                      | (Et <sub>4</sub> N) <sub>2</sub> • <b>[2]</b>                                                                  | (Et <sub>4</sub> N) <sub>2</sub> • <b>[3]</b>                                                                  | (Et <sub>4</sub> N) <sub>2</sub> • <b>[4]</b> •DMF                                                              | (Et <sub>4</sub> N) <sub>2</sub> • <b>[5]</b> •2DMF                                                                         | (Et <sub>4</sub> N) <sub>2</sub> • <b>[6]</b> •8DMF                                                                           |
|------------------------------------------------------------------------------|----------------------------------------------------------------------------------------------------------------|----------------------------------------------------------------------------------------------------------------|-----------------------------------------------------------------------------------------------------------------|-----------------------------------------------------------------------------------------------------------------------------|-------------------------------------------------------------------------------------------------------------------------------|
| Empirical formula                                                            | C <sub>54</sub> H <sub>104</sub> B <sub>2</sub> Fe <sub>6</sub> N <sub>16</sub> S <sub>10</sub> W <sub>2</sub> | C <sub>70</sub> H <sub>104</sub> B <sub>2</sub> Fe <sub>6</sub> N <sub>16</sub> S <sub>10</sub> W <sub>2</sub> | C <sub>77</sub> H <sub>119</sub> B <sub>2</sub> Fe <sub>6</sub> N <sub>17</sub> OS <sub>10</sub> W <sub>2</sub> | C <sub>52</sub> H <sub>98</sub> B <sub>2</sub> Fe <sub>6</sub> N <sub>30</sub> O <sub>2</sub> S <sub>6</sub> W <sub>2</sub> | C <sub>74</sub> H <sub>140</sub> B <sub>2</sub> Fe <sub>6</sub> N <sub>24</sub> O <sub>12</sub> S <sub>6</sub> W <sub>2</sub> |
| Formula weight                                                               | 2022.55                                                                                                        | 2214.71                                                                                                        | 2343.9                                                                                                          | 2092.38                                                                                                                     | 2483.94                                                                                                                       |
| Crystal system                                                               | Monoclinic                                                                                                     | Monoclinic                                                                                                     | Triclinic                                                                                                       | Triclinic                                                                                                                   | Orthorhombic                                                                                                                  |
| Space group                                                                  | <i>P</i> 2 <sub>1</sub> / <i>n</i>                                                                             | <i>C</i> 2/ <i>c</i>                                                                                           | <i>P</i> -1                                                                                                     | <i>P</i> -1                                                                                                                 | <i>I</i> bam                                                                                                                  |
| Z                                                                            | 2                                                                                                              | 4                                                                                                              | 4                                                                                                               | 1                                                                                                                           | 4                                                                                                                             |
| a (Å)                                                                        | 12.814(5)                                                                                                      | 27.096(4)                                                                                                      | 14.222(3)                                                                                                       | 10.9698(17)                                                                                                                 | 24.0221(8)                                                                                                                    |
| b (Å)                                                                        | 18.930(8)                                                                                                      | 19.118(3)                                                                                                      | 25.989(5)                                                                                                       | 11.9853(18)                                                                                                                 | 18.0186(6)                                                                                                                    |
| c (Å)                                                                        | 15.716(6)                                                                                                      | 20.286(3)                                                                                                      | 28.267(5)                                                                                                       | 15.905(2)                                                                                                                   | 23.9879(7)                                                                                                                    |
| α (°)                                                                        | 90                                                                                                             | 90                                                                                                             | 76.250(2)                                                                                                       | 72.820(2)                                                                                                                   | 90                                                                                                                            |
| β (°)                                                                        | 95.057(9)                                                                                                      | 98.477(2)                                                                                                      | 89.471(2)                                                                                                       | 83.033(2)                                                                                                                   | 90                                                                                                                            |
| γ (°)                                                                        | 90                                                                                                             | 90                                                                                                             | 88.082(2)                                                                                                       | 81.869(2)                                                                                                                   | 90                                                                                                                            |
| V (Å <sup>3</sup> )                                                          | 3797(3)                                                                                                        | 10393(3)                                                                                                       | 10142(3)                                                                                                        | 1970.7(5)                                                                                                                   | 10383.0(6)                                                                                                                    |
| <i>D</i> <sub>calcd</sub> (g cm <sup>-3</sup> )                              | 1.769                                                                                                          | 1.415                                                                                                          | 1.535                                                                                                           | 1.763                                                                                                                       | 1.589                                                                                                                         |
| μ (mm <sup>-1</sup> )                                                        | 4.449                                                                                                          | 3.258                                                                                                          | 3.344                                                                                                           | 4.194                                                                                                                       | 3.203                                                                                                                         |
| <i>F</i> (000)                                                               | 2028.0                                                                                                         | 4440.0                                                                                                         | 4728.0                                                                                                          | 1046.0                                                                                                                      | 5068.0                                                                                                                        |
| GOF on <i>F</i> <sup>2</sup>                                                 | 0.962                                                                                                          | 1.008                                                                                                          | 1.019                                                                                                           | 1.030                                                                                                                       | 1.083                                                                                                                         |
| <i>R</i> <sub>1</sub> <sup>a</sup> , <i>wR</i> <sub>2</sub> <sup>b</sup> (°) | 0.0462, 0.1213                                                                                                 | 0.0366, 0.0927                                                                                                 | 0.0440, 0.0926                                                                                                  | 0.0364, 0.0785                                                                                                              | 0.0442, 0.1235                                                                                                                |
| <i>R</i> <sub>1</sub> <sup>a</sup> , <i>wR</i> <sub>2</sub> <sup>b</sup> (°) | 0.0524, 0.1259                                                                                                 | 0.0575, 0.1026                                                                                                 | 0.0777, 0.1072                                                                                                  | 0.0527, 0.0855                                                                                                              | 0.0465, 0.1261                                                                                                                |
| (Δρ) <sub>max</sub> / (Δρ) <sub>min</sub> <sup>c</sup>                       | 1.57 / -0.59                                                                                                   | 0.81 / -0.42                                                                                                   | 1.53 / -1.15                                                                                                    | 1.45 / -0.78                                                                                                                | 0.98 / -1.38                                                                                                                  |

<sup>a</sup> *R*<sub>1</sub> = Σ(|*F*<sub>o</sub> - |*F*<sub>c</sub>||) / Σ|*F*<sub>o</sub>|. <sup>b</sup> *wR*<sub>2</sub> = {Σ[w(*F*<sub>o</sub><sup>2</sup> - *F*<sub>c</sub><sup>2</sup>)<sup>2</sup>] / Σ[w(*F*<sub>o</sub><sup>2</sup>)<sup>2</sup>]}<sup>1/2</sup>. <sup>c</sup> |*I* ≥ 2σ(*I*)|. <sup>d</sup> [all data]. <sup>e</sup> unit (e·Å<sup>-3</sup>)
